# Supplementary material
Source: PubMed Central journal article supplement (PMC3371635)
Supplement: NIHMS48678-supplement-Suppl_Material.pdf [file NIHMS48678-supplement-Suppl_Material.pdf]

# Supplementary Material

## **Mechanisms underlying reductant-induced ROS formation by anticancer copper(II) compounds**

*Christian R. Kowol,<sup>‡,§</sup> Petra Heffeter,<sup>#,§</sup> Walter Miklos,<sup>#</sup> Lars Gille,<sup>§</sup> Robert Trondl,<sup>‡</sup> Loredana  
Cappellacci,<sup>†</sup> Walter Berger,<sup>#,§,\*</sup> Bernhard K. Keppler<sup>‡,§</sup>*

<sup>‡</sup> University of Vienna, Institute of Inorganic Chemistry, Waehringer Str. 42, A-1090 Vienna, Austria

<sup>#</sup> Department of Medicine I, Institute of Cancer Research, Medical University of Vienna, Borschkegasse  
8a, A-1090 Vienna, Austria

<sup>§</sup> Comprehensive Cancer Center of the Medical University Vienna, Austria and Research Platform  
“Translational Cancer Therapy Research” Vienna, Austria

<sup>§</sup> Molecular Pharmacology and Toxicology Unit, Department of Biomedical Sciences, University of  
Veterinary Medicine Vienna, Veterinaerplatz 1, A-1210 Vienna, Austria

<sup>†</sup> School of Pharmacy, Medicinal Chemistry Unit, University of Camerino, Via S. Agostino 1, 62032  
Camerino, Italy

## Table of contents

|                                                                                                                              | page number  |
|------------------------------------------------------------------------------------------------------------------------------|--------------|
| Crystal chain structure of <b>Cu-Triapine</b>                                                                                | <b>S3</b>    |
| EPR Spectra of the copper(II) complexes                                                                                      | <b>S3-S5</b> |
| Impact of reductants on the anticancer activity of the copper complexes in HL60 cells                                        | <b>S6</b>    |
| Effect of extracellular SOD and CAT on thiol-induced ROS generation for <b>Cu-FTSC</b> , <b>Cu-APTSC</b> and <b>Cu-BPYTA</b> | <b>S7</b>    |
| X-Ray crystallographic data                                                                                                  | <b>S10</b>   |

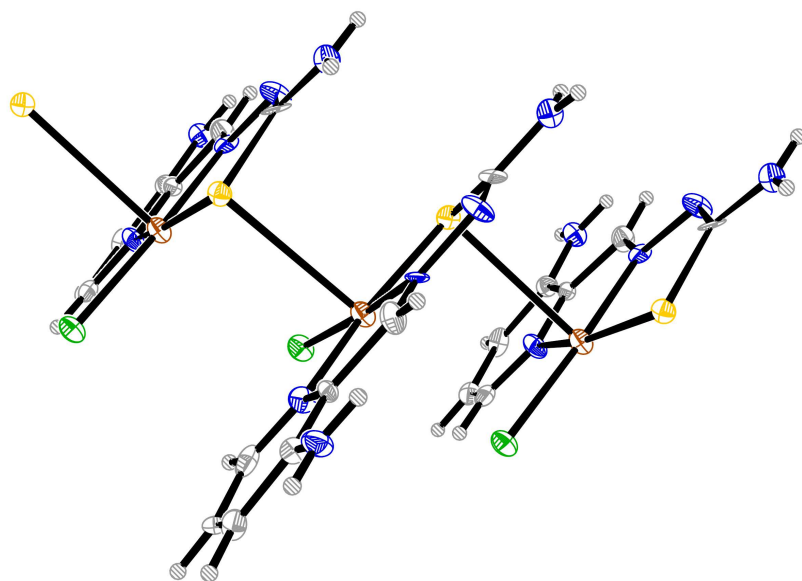

**Figure S1.** Chain structure of **Cu-Triapine** molecules with thermal ellipsoids depicted at 50% probability level (the  $\text{H}_3\text{O}^+\text{Cl}^-$  fragments are omitted). (Cu = brown, Cl = green, S = yellow, N = blue, C and H = grey)

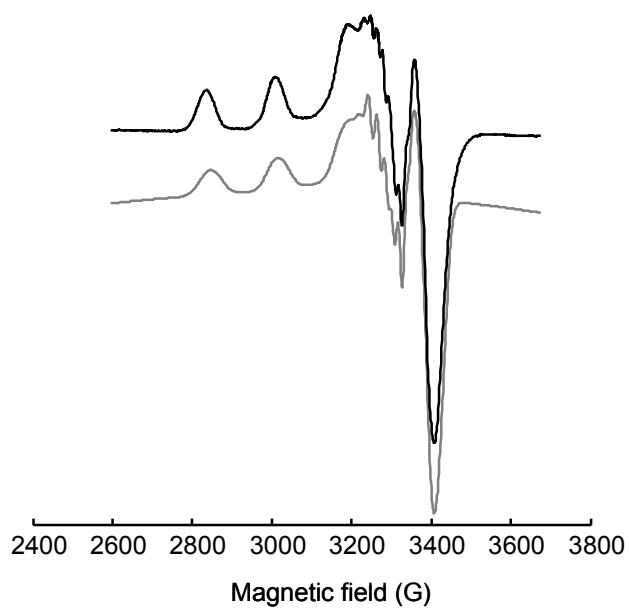

**Figure S2.** EPR spectrum of 1 mM **Cu-FTSC** (black) in DMSO/DMF (1:3 v/v) and the simulated EPR spectrum (grey). Experimental conditions:  $\nu = 9.4$  GHz,  $T = 77$  K.

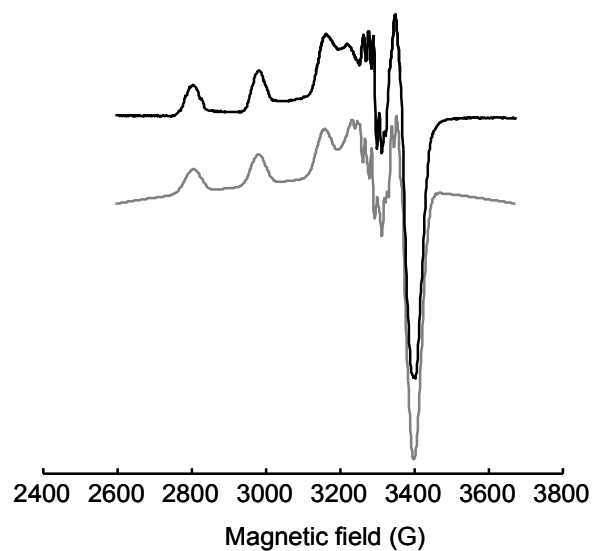

**Figure S3.** EPR spectrum of 1 mM **Cu(OAc)-Triapine** (black) in DMSO/DMF (1:3 v/v) and the simulated EPR spectrum (grey). Experimental conditions:  $\nu = 9.4$  GHz,  $T = 77$  K.

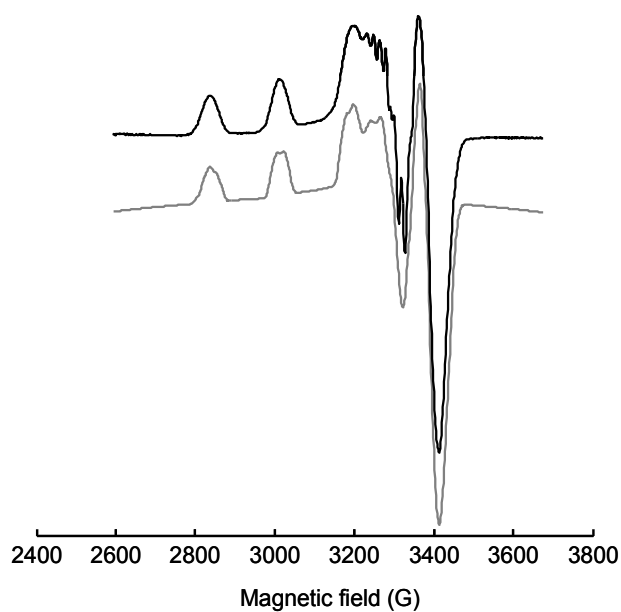

**Figure S4.** EPR spectrum of 1 mM **Cu-APTSC** (black) in DMSO/DMF (1:3 v/v) and the simulated EPR spectrum (grey). Experimental conditions:  $\nu = 9.4$  GHz,  $T = 77$  K.

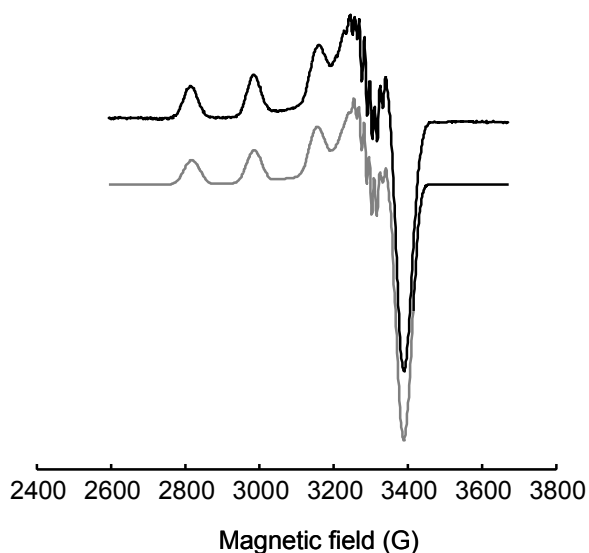

**Figure S5.** EPR spectrum of 1 mM **Cu-BPYTA** (black) in DMSO/DMF (1:3 v/v) and the simulated EPR spectrum (grey). Experimental conditions:  $\nu = 9.4$  GHz,  $T = 77$  K.

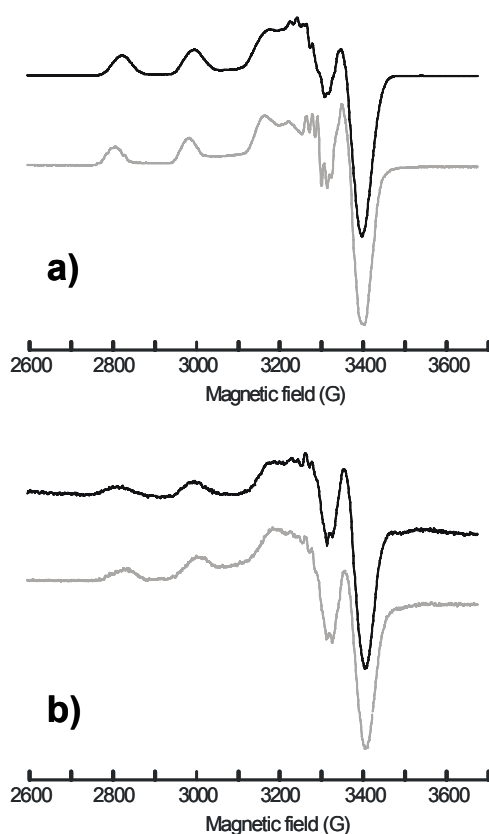

**Figure S6.** a) EPR spectra of 1mM **Cu-Triapine** (black) and **Cu(OAc)-Triapine** (grey) in DMSO/DMF (1:3 v/v) and b) 1mM **Cu-Triapine** (black) and **Cu(OAc)-Triapine** (grey) in DMSO/PBS pH 7.4 (1:1 v/v). Experimental conditions:  $\nu = 9.4$  GHz,  $T = 77$  K.

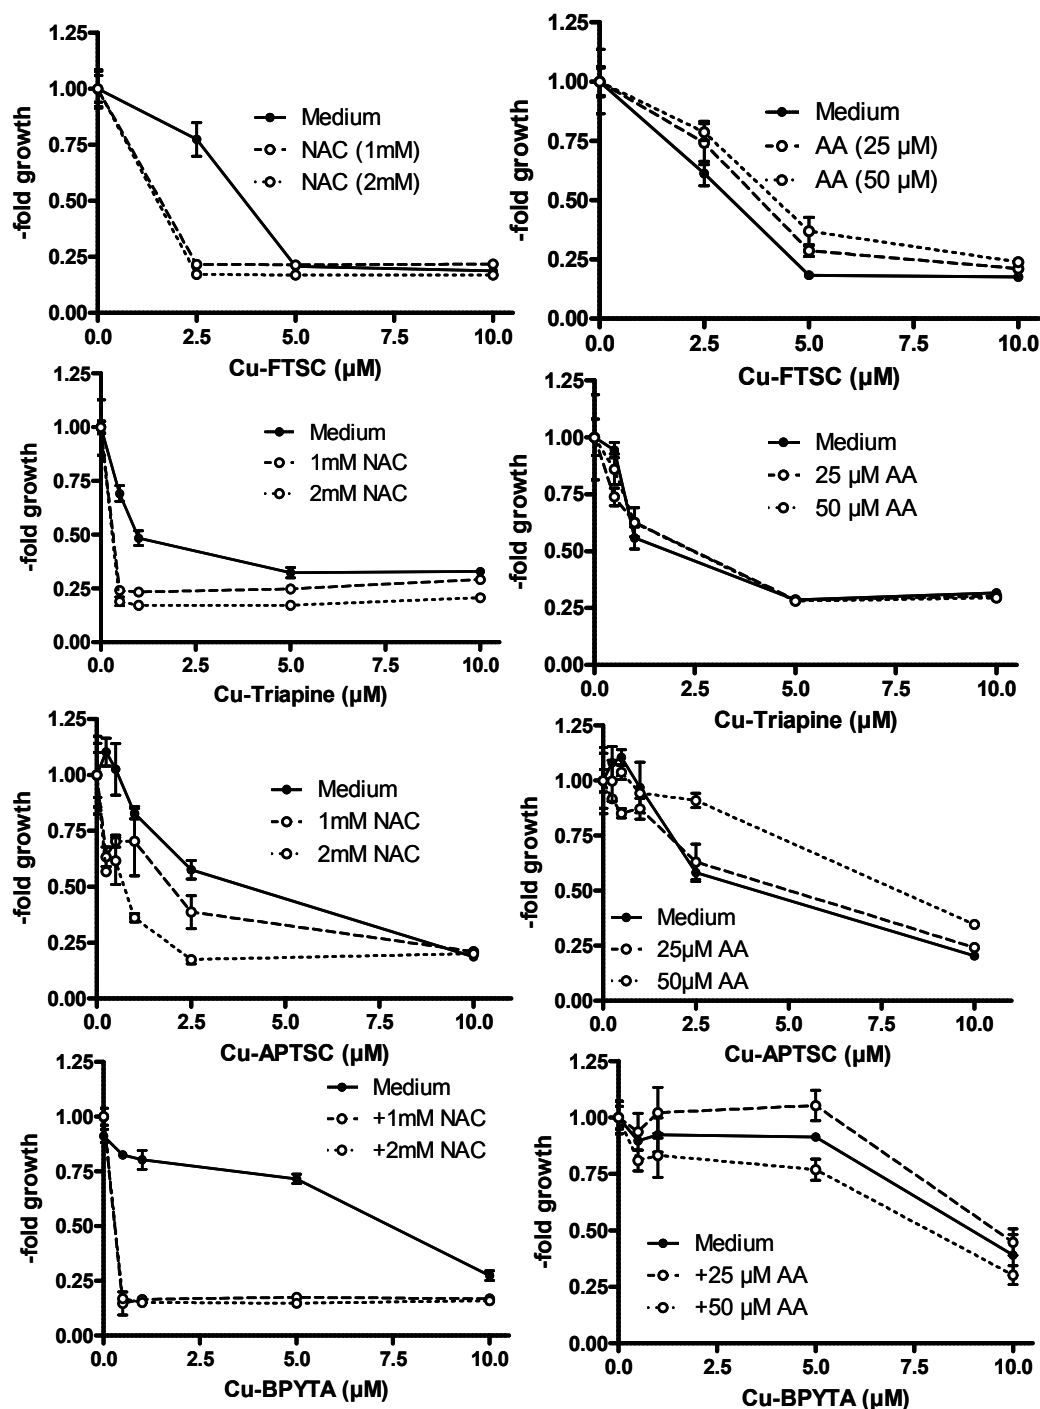

**Figure S7. Impact of reductants on the anticancer activity of the copper complexes in HL60 cells.**

To evaluate the effects of reductants, the GSH precursor NAC as well as the anti-oxidant ascorbic acid were used. Briefly, after 30 min preincubation with NAC (1 and 2 mM) or AA (25 and 50 μM), HL60 cells were treated for 72 h with the indicated concentrations of the Cu complexes. Vitality was determined using MTT assay. Values given are means  $\pm$  standard deviation of three determinations out of three experiments.

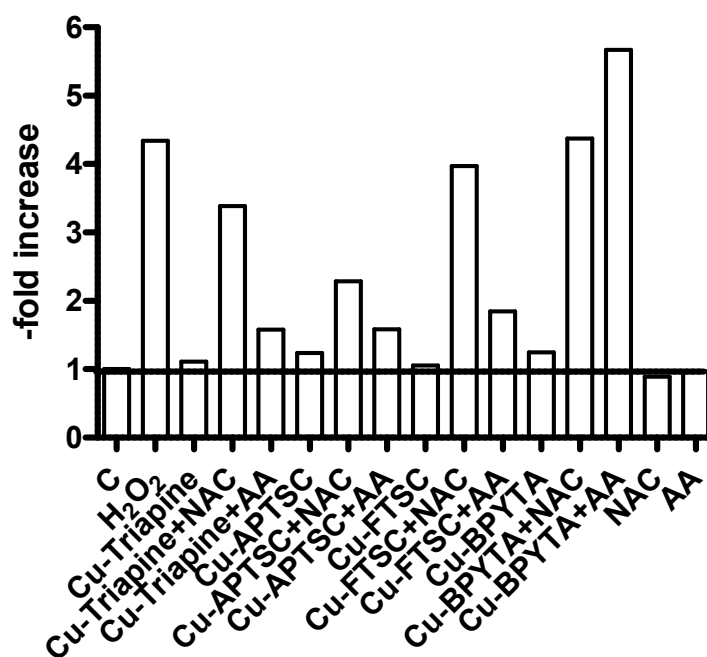

**Figure S8. Reductant-induced ROS generation by the Cu complexes.** Influence of pretreatment with 2 mM NAC or 50  $\mu$ M AA on the intracellular ROS levels in HL60 cells after incubation with the Cu complexes (5  $\mu$ M) was determined using the ROS indicator DCF-DA. Fluorescence was measured by flow cytometry. One representative experiment out of two delivering comparable results is shown.

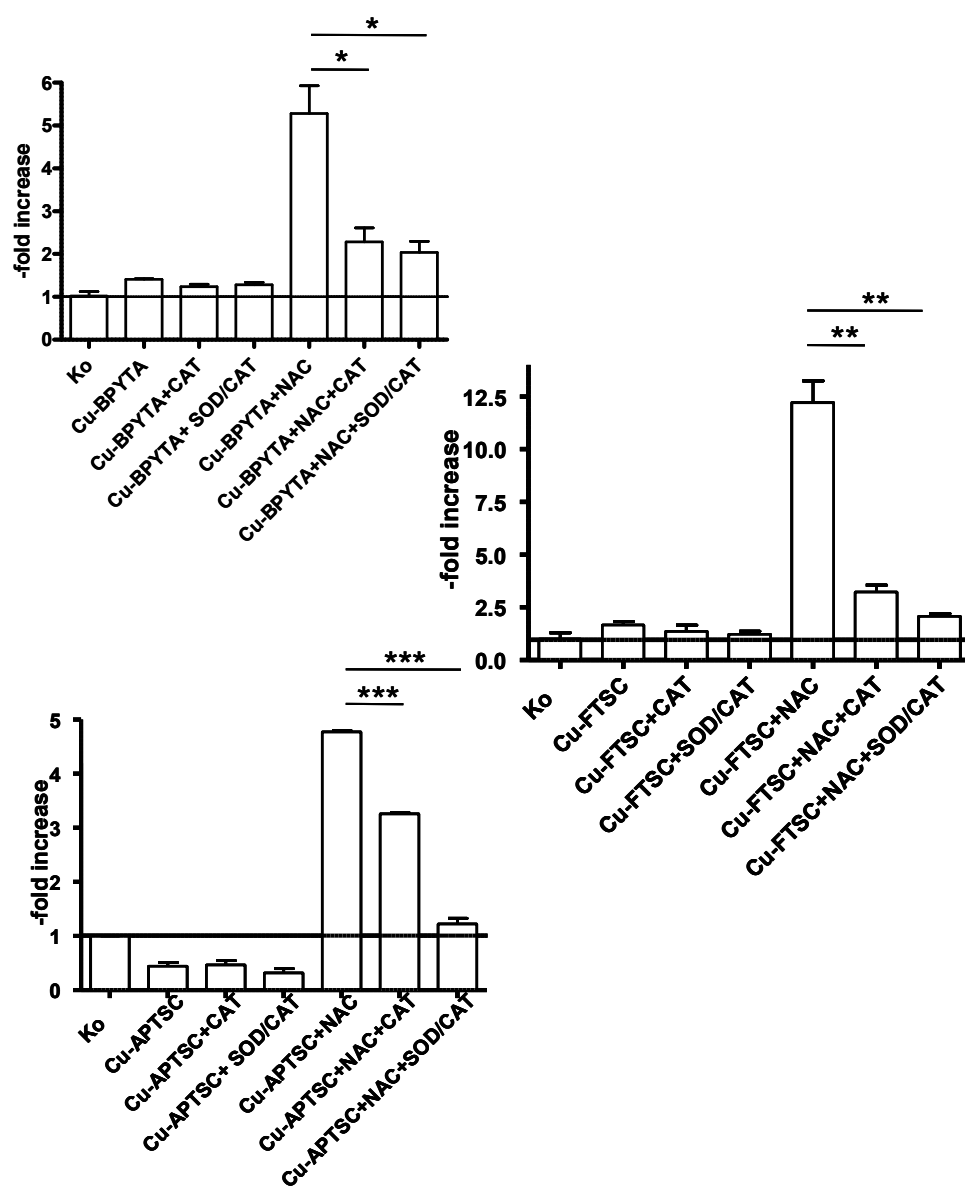

**Figure S9. Effect of extracellular SOD and CAT on thiol-induced ROS generation.** Influence of SOD and CAT cotreatment (100 units/ml) on the NAC-induced (2 mM) ROS-formation of A) Cu-BPYTA, B) Cu-FTSC, C) Cu-APTSC (25  $\mu$ M) in HL60 cells was determined using the H<sub>2</sub>O<sub>2</sub>-detecting dye DCF-DA. Fluorescence was measured by flow cytometry. One representative experiment out of three delivering comparable results is shown.



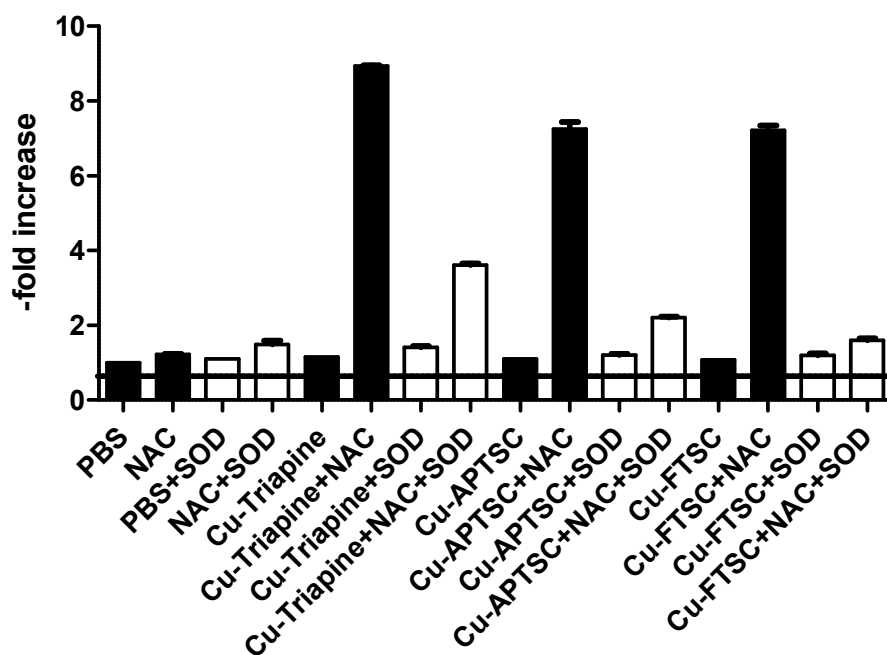

**Figure S10. Impact of SOD cotreatment in the  $O_2^{\cdot-}$  generation ability of the Cu complexes in the presence of NAC and AA.** Levels of Cu complex-generated  $O_2^{\cdot-}$  in dependence of NAC (2 mM) and AA (50  $\mu$ M) were determined measuring the reduction of NBT spectrophotometrically in presence or absence of SOD (5 units/mL; Superoxide Dismutase from bovine erythrocytes, Sigma-Aldrich). The copper complexes were used at concentrations of 25  $\mu$ M. Values given are means  $\pm$  standard deviation of three determinations.

## X-Ray crystallographic data

**Table S1.** Crystal data, data collection parameters and structure refinement details for Cu-Triapine.

|                                             | <b>Cu-Triapine</b>                                                 |
|---------------------------------------------|--------------------------------------------------------------------|
| Empirical                                   | C <sub>7</sub> H <sub>11</sub> Cl <sub>2</sub> CuN <sub>5</sub> OS |
| Formula weight                              | 347.71                                                             |
| Space group                                 | <i>P</i> 2 <sub>1</sub> / <i>c</i>                                 |
| <i>a</i> [Å]                                | 17.798(18)                                                         |
| <i>b</i> [Å]                                | 9.686(9)                                                           |
| <i>c</i> [Å]                                | 7.109(7)                                                           |
| $\alpha$ [deg]                              |                                                                    |
| $\beta$ [deg]                               | 97.59(3)                                                           |
| $\gamma$ [deg]                              |                                                                    |
| <i>V</i> [Å <sup>3</sup> ]                  | 1215(2)                                                            |
| <i>Z</i>                                    | 4                                                                  |
| $\lambda$ [Å]                               | 0.71073                                                            |
| $\rho_{\text{calcd}}$ [g cm <sup>-3</sup> ] | 1.901                                                              |
| Crystal size [mm]                           | 0.30 × 0.13 × 0.03                                                 |
| <i>T</i> [K]                                | 100                                                                |
| $\mu$ [mm <sup>-1</sup> ]                   | 2.399                                                              |
| <i>R</i> <sub>1</sub> <sup>[a]</sup>        | 0.0680                                                             |
| <i>wR</i> <sub>2</sub> <sup>[b]</sup>       | 0.2632                                                             |
| GOF <sup>[c]</sup>                          | 1.002                                                              |

<sup>a</sup>  $R_1 = \Sigma||F_o| - |F_c||/\Sigma|F_o|$ . <sup>b</sup>  $wR_2 = \{\Sigma[w(F_o^2 - F_c^2)^2]/\Sigma[w(F_o^2)^2]\}^{1/2}$ . <sup>c</sup> GOF =  $\{\Sigma[w(F_o^2 - F_c^2)^2]/(n - p)\}^{1/2}$ , where *n* is the number of reflections and *p* is the total number of parameters refined.
